# Supplementary material
Source: Springer Nature journal article supplement (https://www.springermedizin.de/resource/supplementary/13012_2009_246_MOESM1_ESM.pdf/9629548)
Supplement: MOESM1 [file 9629548]

## Medline Search Strategy

OR:

1. "research us\*".m\_titl.
2. "research utiliz\*".m\_titl.
3. "research utilis\*".m\_titl.
4. exp "Diffusion of Innovation"/
5. exp Evidence-Based Medicine/
6. "research implement\*".m\_titl.

AND

1. barrier\*.mp.

AND

1. nurs\*.mp.

## CINAHL Search Strategy

OR:

1. TI research us\*
2. TI research utiliz\*
3. TI research utilis\*
4. MH "diffusion of innovation"
5. MH "professional practice, research-based+"
6. MH "Professional Practice, research-based+"
7. MH "Professional practice, evidence-based+"
8. TI research implement\*

AND

1. barrier\*

AND

1. Nurs\*
